# Supplementary material for: An invertebrate-specific and immune-responsive microRNA augments oyster haemocyte phagocytosis by targeting CgIκB2
Source: PubMed Central journal article supplement (PMC4941716; doi:10.1038/srep29591), 2016-07-12
Supplement: srep29591-s1.pdf [file srep29591-s1.pdf]

An invertebrate-specific and immune-responsive microRNA augments  
oyster haemocyte phagocytosis by targeting CgIκB2

Hao Chen<sup>1,3</sup>, Zhi Zhou<sup>1</sup>, Hao Wang<sup>1</sup>, Lingling Wang<sup>1\*</sup>, Weilin Wang<sup>1,3</sup>, Rui Liu<sup>1</sup>,  
Limei Qiu<sup>1</sup>, Linsheng Song<sup>1,2\*</sup>

<sup>1</sup> Key Laboratory of Experimental Marine Biology, Institute of Oceanology,  
Chinese Academy of Sciences, Qingdao 266071, China

<sup>2</sup> Key Laboratory of Mariculture & Stock enhancement in North China's Sea,  
Ministry of Agriculture, Dalian Ocean University, Dalian 116023, China

<sup>3</sup> University of Chinese Academy of Sciences, Beijing 100049, China

**\* Corresponding author:**

Prof. Linsheng Song (lshsong@dlou.edu.cn)

Dalian Ocean University, 52 Heishijiao Street, Dalian 116023, China.

Tel: +86 411 84762652; Email address: lshsong@dlou.edu.cn

Prof. Lingling Wang (wanglingling@qdio.ac.cn)

Institute of Oceanology, Chinese Academy of Sciences, 7 Nanhai Street, Qingdao  
266071, China.

Tel: +86 532 82898843; Email address: wanglingling@qdio.ac.cn

Table S1. Group and transfection information of the 3'UTR luciferase reporter assay

| Group             | Blank | Positive control | cgi-miR-2d | miRNA control |
|-------------------|-------|------------------|------------|---------------|
| Recombined vector | 100ng | 100ng            | 100ng      | 100ng         |
| Positive control  |       | 5 pmol           |            |               |
| Cgi-miR-2d mimics |       |                  | 5 pmol     |               |
| miRNA control     |       |                  |            | 5 pmol        |

Table S1. Group and transfection information of the 3'UTR luciferase reporter assay conducted in the present study. A total of 100 ng recombined plasmid containing either wild type or mutated type CgIkB2 3'-UTR was transfected into cells of blank group. An additional of 5 pmol positive control mimics or cgi-miR-2d mimics or miRNA control were co-transfected with the plasmid into cells of positive control, cgi-miR-2d and miRNA control group, respectively.

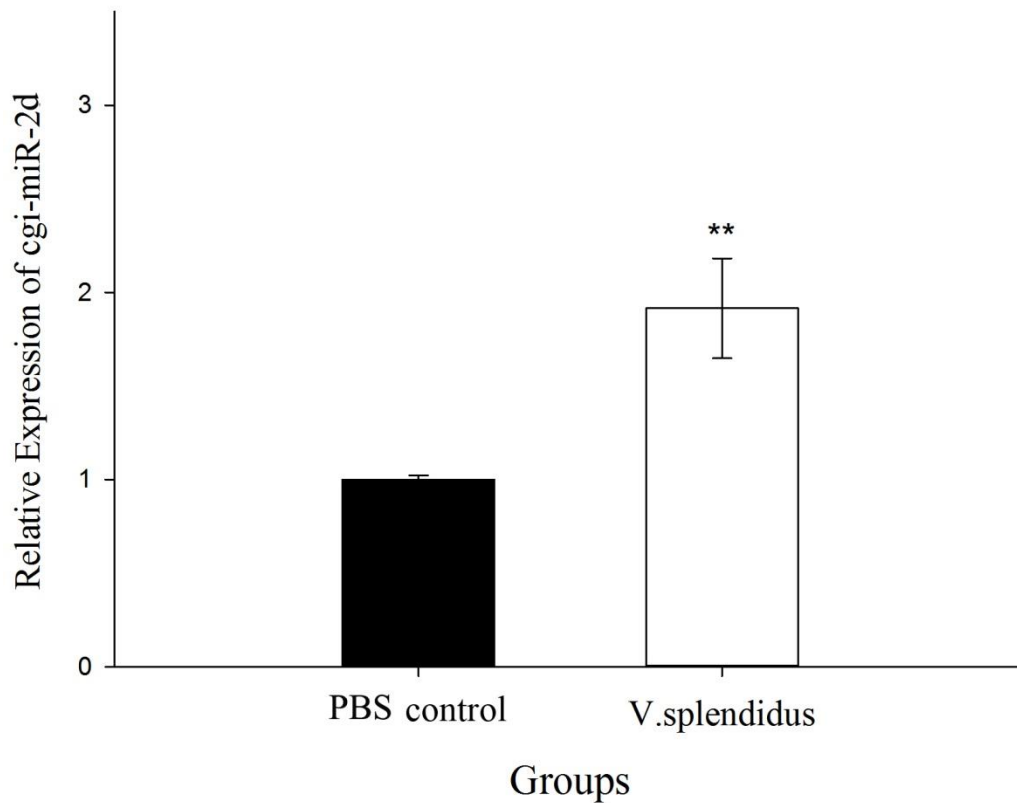

**Figure S1. Alternations of cgi-miR-2d transcripts in challenge group at 12h compared to that in PBS control group.**

A significant increase of cgi-miR-2d was observed in *V. splendidus* challenge group at 12 h post injection in comparison with that in PBS control group which was consistent with results reported by Zhou Zhi *et.al.*.

## Graphical view of effective siRNA candidates

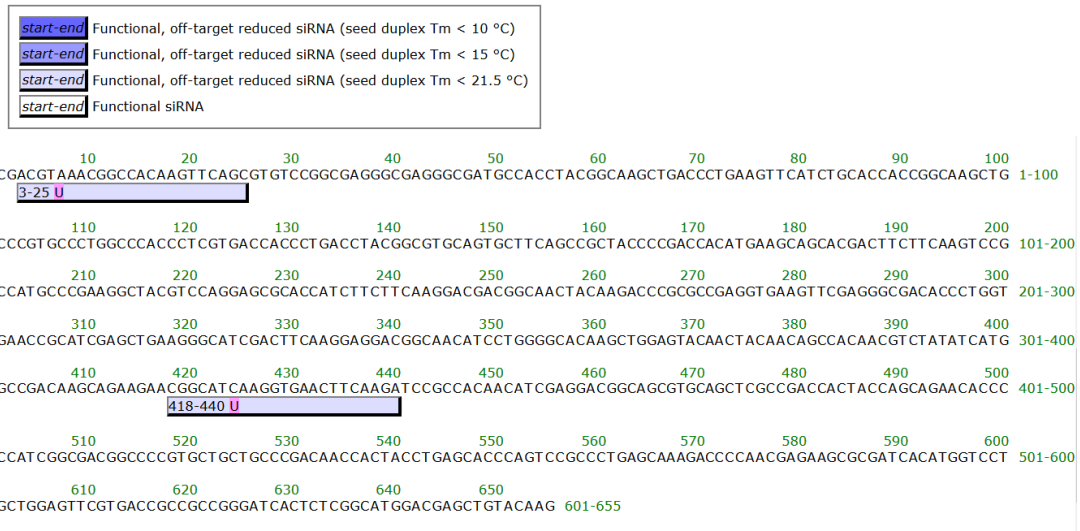

**Figure S2. siRNA candidates of dsRNA of sequence from pEGFP-N1.**

A DNA fragment of pEGFP-N1 was cloned to synthesize dsRNA control. The putative siRNA candidates of pEGFP-N1 dsRNA were predicted by <http://sidirect2.mai.jp/> with default settings and illustrated in color.
